# Supplementary material
Source: PubMed Central journal article supplement (PMC2646543)
Supplement: en.2008-1069_1.pdf [file en.2008-1069_1.pdf]

## Suppl Fig 1

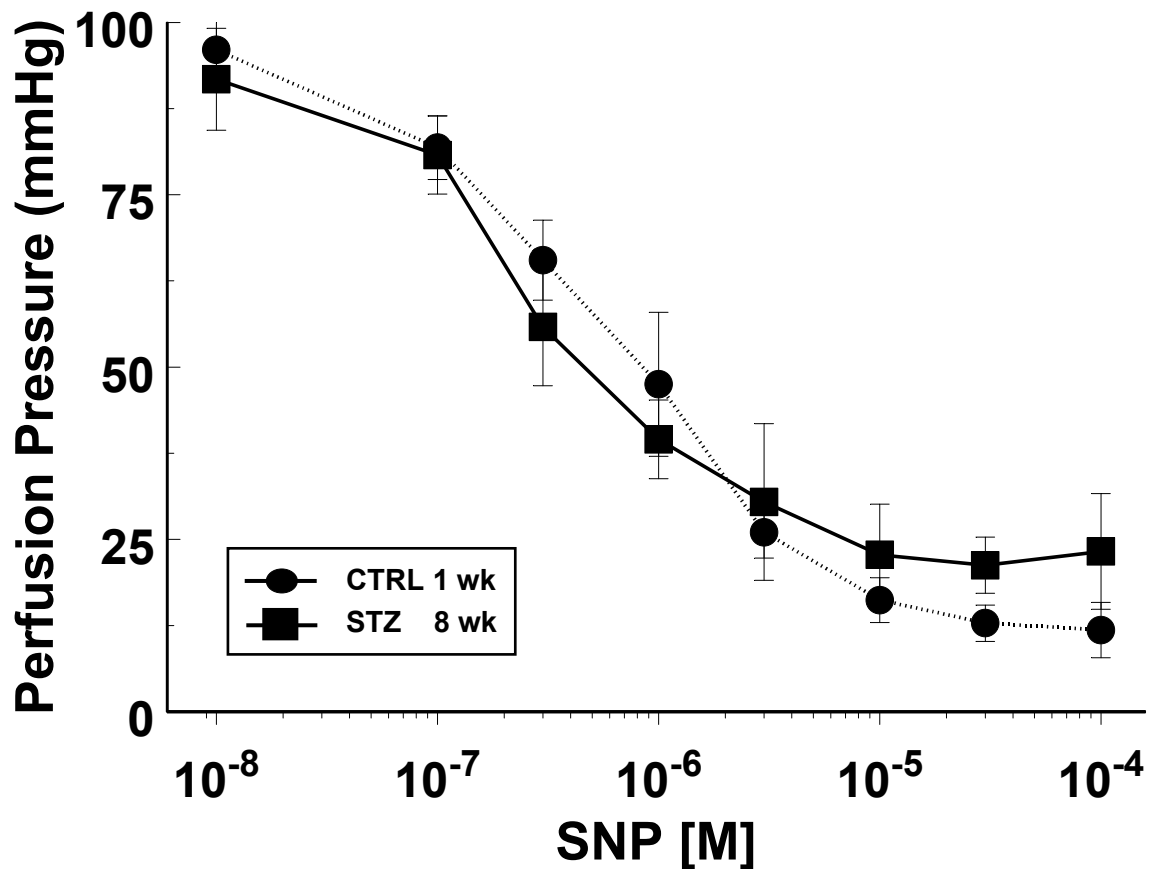

**Suppl. Figure 1.** *Endothelium-independent relaxation does not differ in mesenteric vessels from CTRL and STZ-treated mice.* MVB were isolated from STZ or vehicle CTRL mice and prepared as described in Methods. Vessels were pre-constricted to obtain a perfusion pressure of approximately 100 mmHg with 3  $\mu$ M and 7  $\mu$ M NA in 1 wk CTRL and 8 wk STZ mice, respectively. Dose-response curves for SNP-induced vasorelaxation were obtained in MVB denuded of endothelium from mice 1 week (squares) or 8 weeks (circles) after treatment with STZ or vehicle control. Results are mean  $\pm$  SEM of 5 (STZ) and 4 (CTRL) independent experiments. No significant difference was observed for SNP-induced vasodilation when results from 1wk STZ and 8wk CTRL were compared ( $p > 0.42$ ).
